# Supplementary material for: Novel Bioformulations Developed from Pseudomonas putida BSP9 and Its Biosurfactant for Growth Promotion of Brassica juncea (L.)
Source: PubMed Central journal article supplement (PMC7601481; doi:10.3390/plants9101349), 2020-10-12
Supplement: plants-09-01349-s001.pdf [file plants-09-01349-s001.pdf]

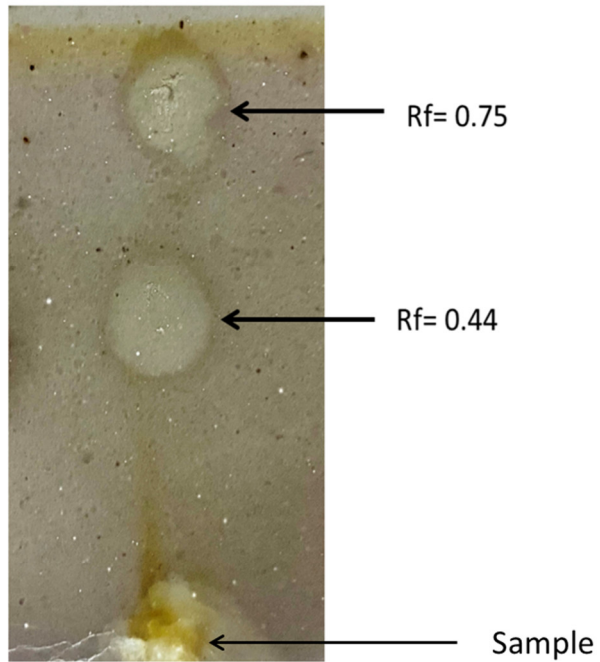

**Supplementary Figure S2.** showing TLC analysis of the crude biosurfactant produced by BSP9. Extracted biosurfactant show two spots with Rf= 0.44 and 0.75 confirming the presence of glycolipids

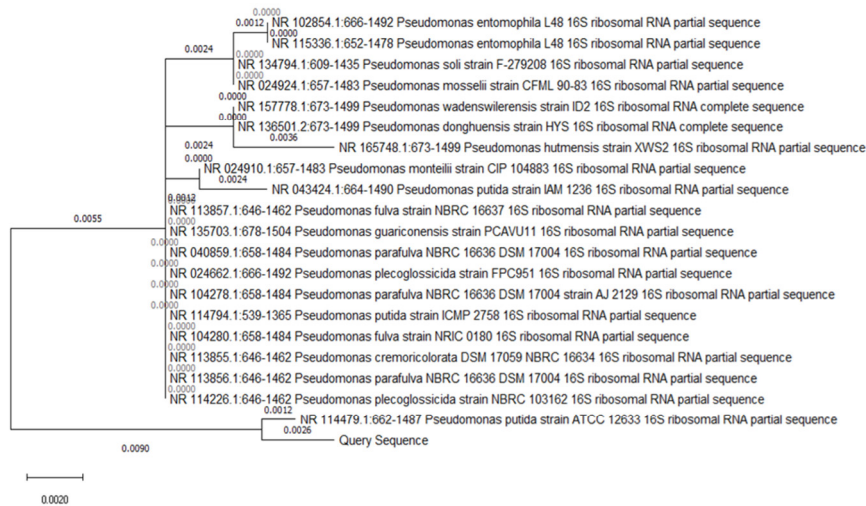

**Figure S1.** showing phylogenetic tree of the isolate BSP9
